# Supplementary material for: Electron-redistributed Ni–Co oxide nanoarrays as an ORR/OER bifunctional catalyst for low overpotential and long lifespan Li–O2 batteries
Source: Royal Society of Chemistry journal article supplement (doi:10.1039/d2ta03604e), 2022-01-01
Supplement: d2ta03604e1.pdf [file d2ta03604e1.pdf]

## Supporting Information

### **Electron redistributed Ni-Co oxide nanoarray as an ORR/OER bifunctional catalyst for low overpotential and long lifespan Li-O<sub>2</sub> batteries**

Weiwei Wang,<sup>‡a</sup> Jinyan Cai,<sup>‡a</sup> Hao Wan,<sup>a</sup> Wenlong Cai,<sup>b</sup> Zixuan Zhu,<sup>a</sup> Chengming Wang,<sup>c</sup> Tiansheng Zhou,<sup>a</sup> Zhiguo Hou,<sup>\*a</sup> Yongchun Zhu,<sup>\*a</sup> and Yitai Qian<sup>\*a</sup>

<sup>a</sup>Department of Applied Chemistry

University of Science and Technology of China

Hefei 230026, P. R. China

E-mail: zghou@ustc.edu.cn; ychzhu@ustc.edu.cn; y tqian@ustc.edu.cn

<sup>b</sup>College of Material Science and Engineering

Sichuan University

Chengdu 610000, P. R. China

<sup>c</sup>Instruments Center for Physical Science

University of Science and Technology of China

Hefei 230026, P. R. China

<sup>‡</sup> These authors contributed equally to this work.

\*Corresponding authors:

E-mail: zghou@ustc.edu.cn; ychzhu@ustc.edu.cn; y tqian@ustc.edu.cn

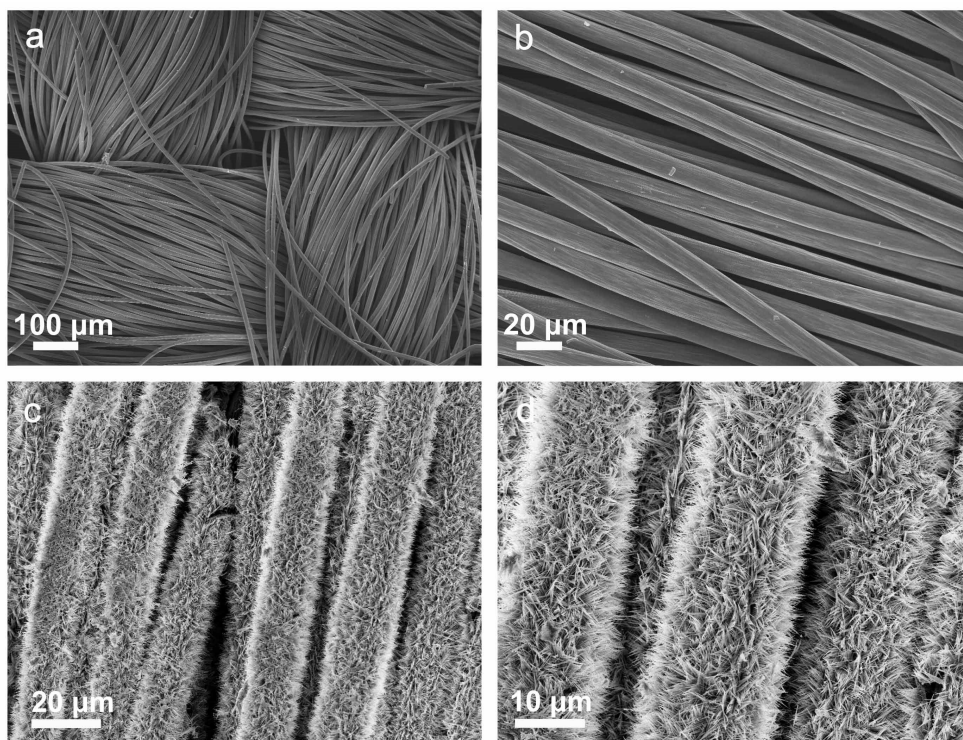

**Fig. S1** SEM images of a-b) Carbon Cloth (CC) and c-d) Ni-Co precursor after hydrothermal reaction at 120 °C on carbon cloth.

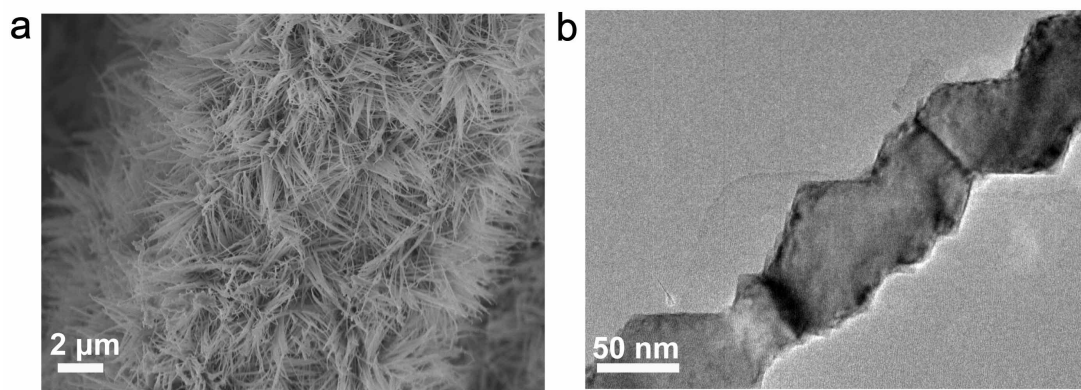

**Fig. S2** SEM and TEM images of NCO/CC.

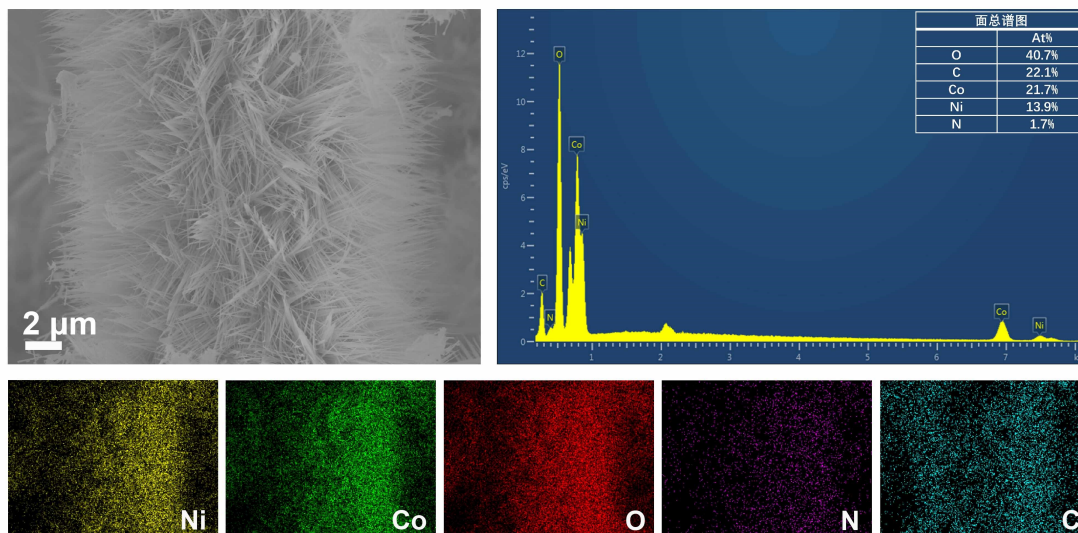

**Fig. S3** SEM and Element mappings of NNCO/CC.

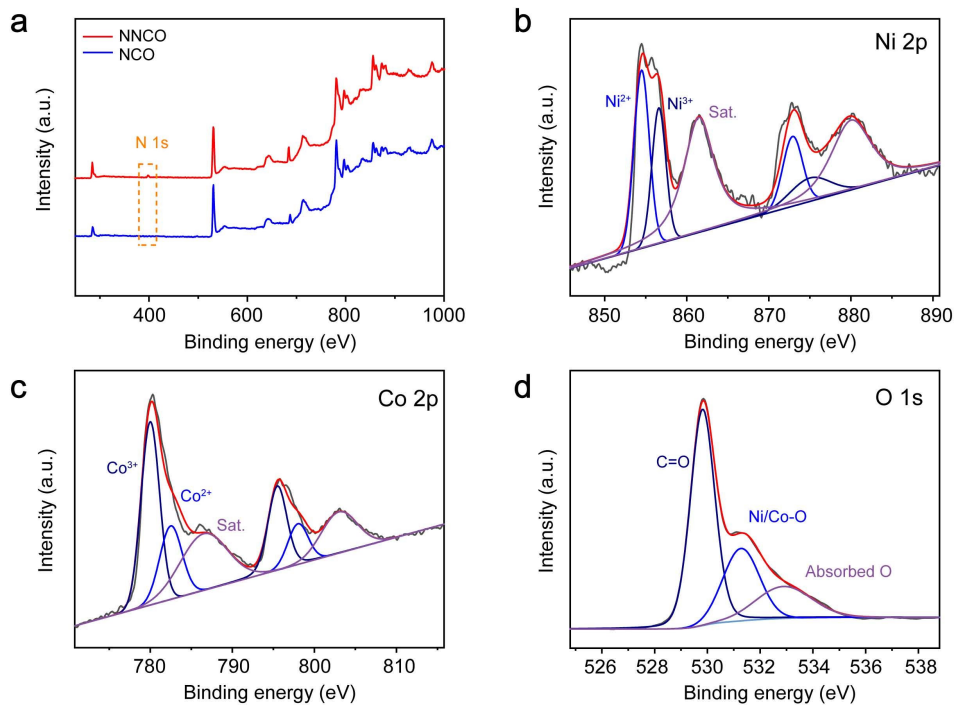

**Fig. S4** a) High-resolution XPS spectra of NNCO/CC and NCO/CC; b-d) High-resolution XPS spectra of Ni 2p, Co 2p, and O 1s of NCO/CC.

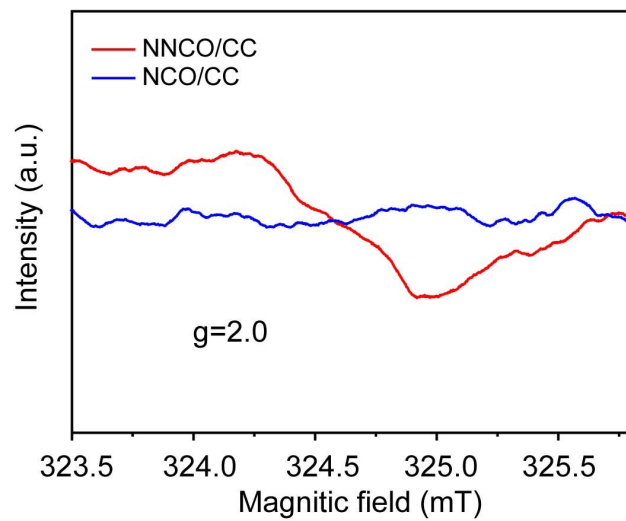

**Fig. S5** Electron paramagnetic resonance (EPR) spectra of NNCO and NCO.

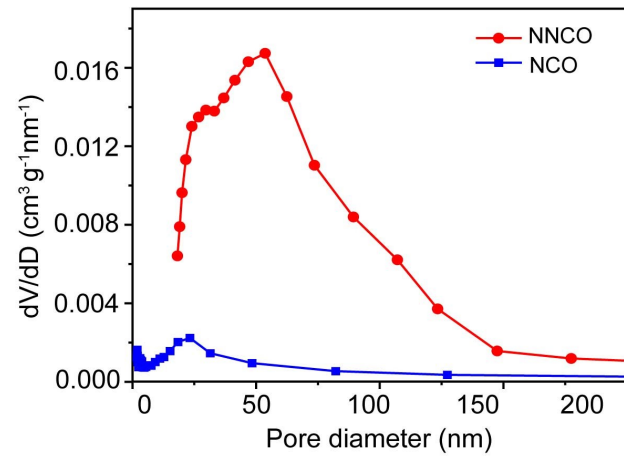

**Fig. S6** Pore size distribution curve of NNCO and NCO.

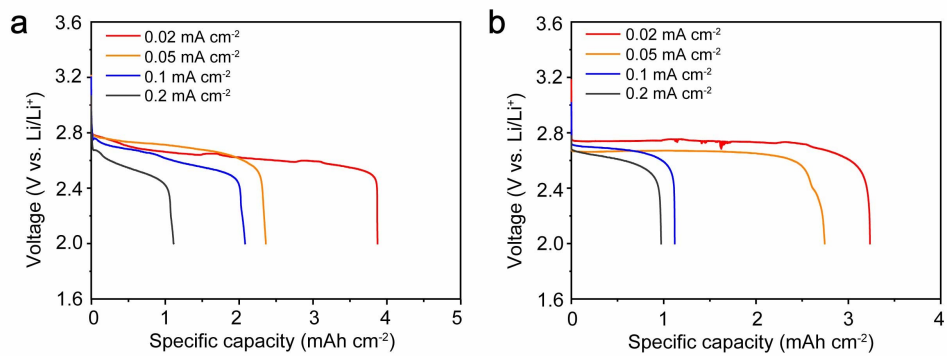

**Fig. S7** The rate capability of NCO/CC and KB electrodes with different current densities.



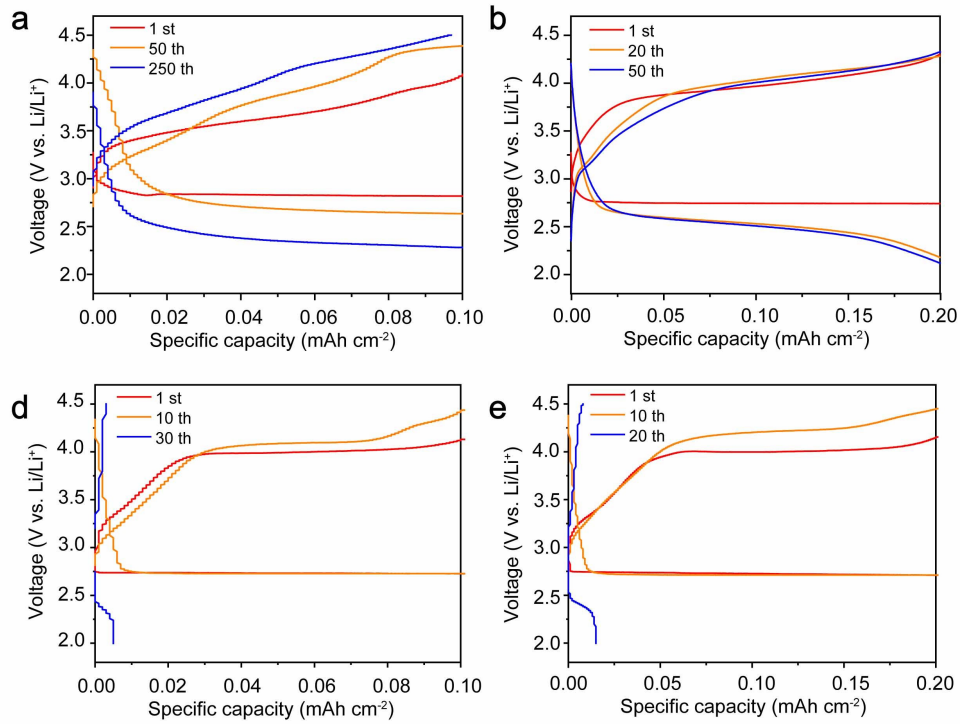

**Fig. S8** a-b) Cycling performance of NCO/CC electrode with a capacity restriction (0.1 or 0.2 mAh cm<sup>-2</sup>) and c-d) Cycling performance of KB electrode with a capacity restriction (0.1 or 0.2 mAh cm<sup>-2</sup>). The specific capacities are calculated with the areal capacity.

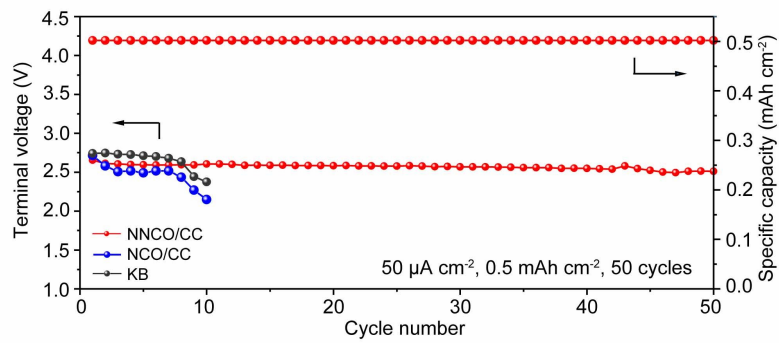

**Fig. S9** Cyclic performance of the NNCO/CC, NCO/CC, and KB cathode at a current of  $0.05 \text{ mA cm}^{-2}$  with a specific capacity limit of  $0.5 \text{ mAh cm}^{-2}$ .

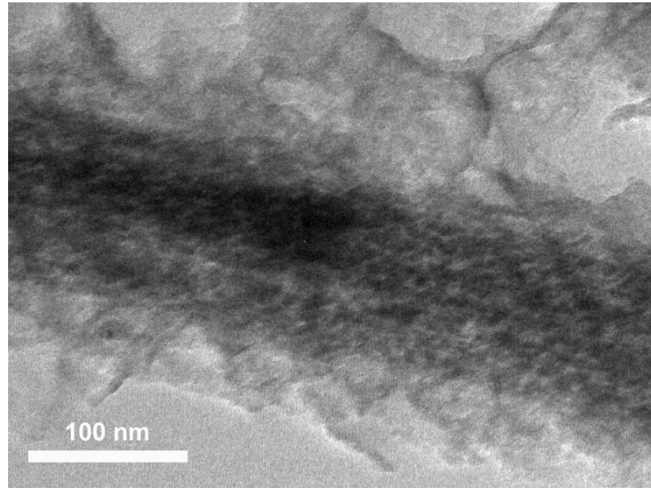

**Fig. S10** TEM images of initial discharged containing NNCO/CC electrode.

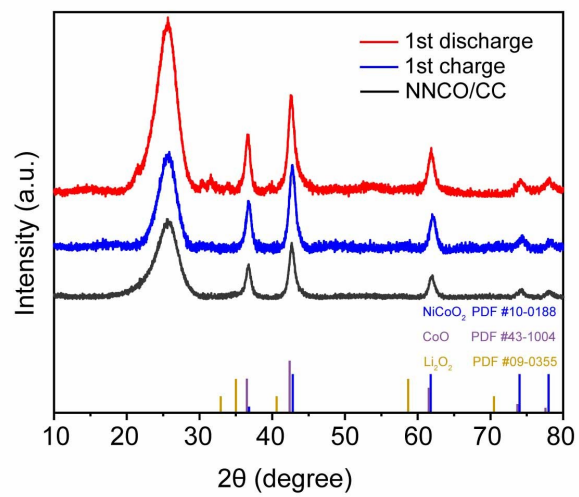

**Fig. S11** XRD patterns of NNCO/CC electrode after initial discharging and recharging processes.

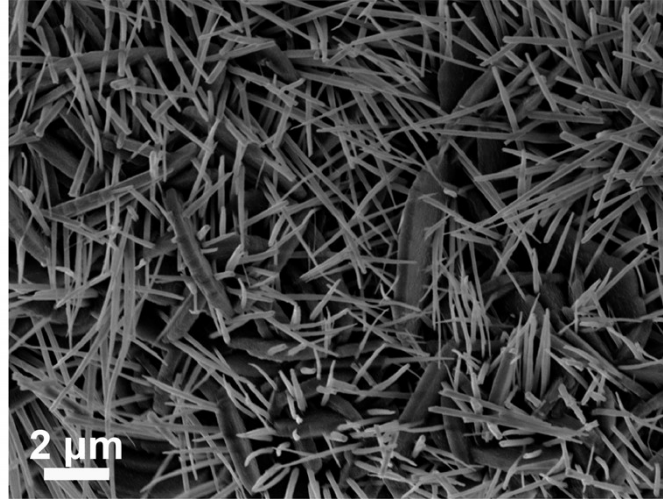

**Fig. S12** Ex-situ SEM images of NCO/CC at  $0.05 \text{ mA cm}^{-2}$  with fully discharged.

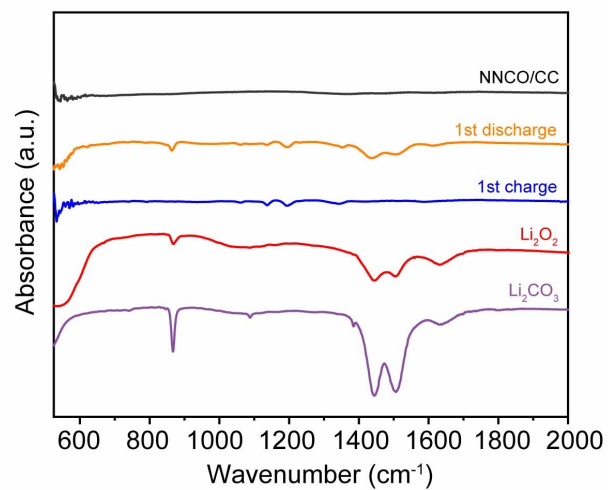

**Fig. S13** FTIR spectra for the NNCO/CC at pristine, discharged (0.05 mA cm<sup>-2</sup>, 0.8 mAh cm<sup>-2</sup>), and recharged states. Reference materials are also displayed.

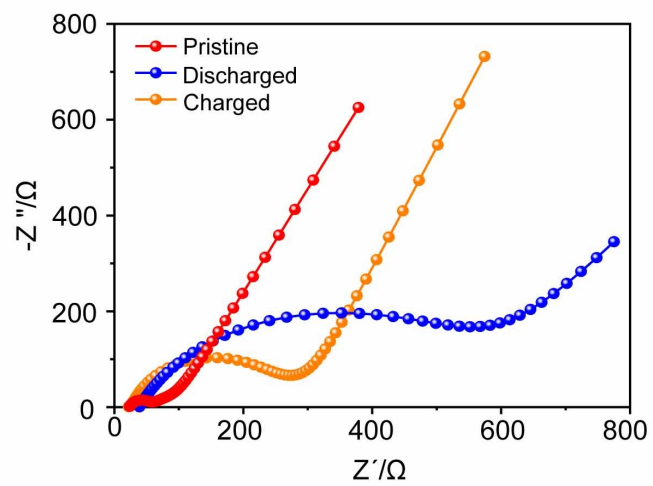

**Fig. S14** EIS taken on the NCO/CC cathode at different charging states.

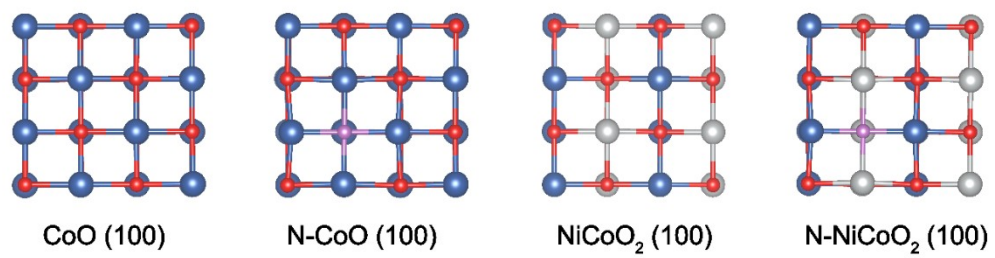

**Fig. S15** The top view of CoO, N-CoO, NiCoO<sub>2</sub>, N-NiCoO<sub>2</sub> model.



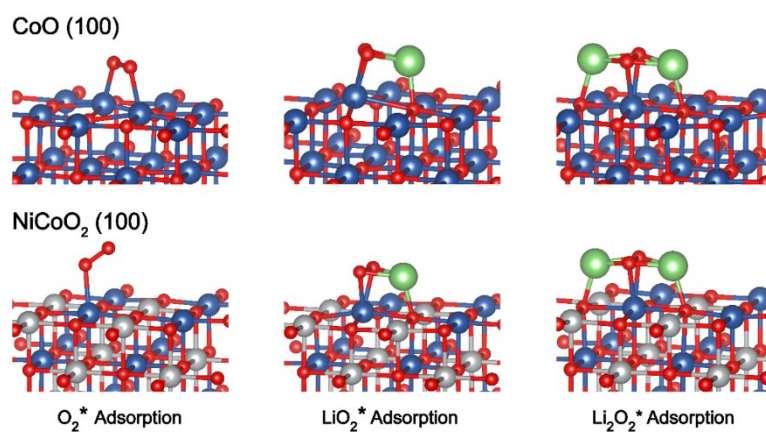

**Fig. S16** Optimized structures of different intermediate adsorbed on (100) plane for CoO and NiCoO<sub>2</sub>.

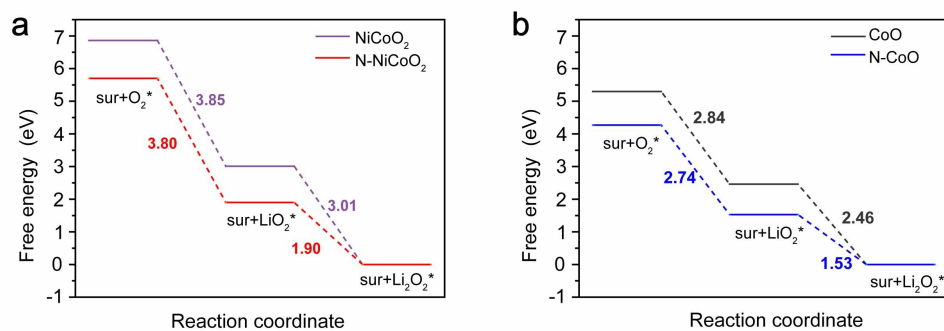

**Fig. S17** Calculated free energy diagrams for the discharge-charge reactions on the active surface of CoO, N-CoO, NiCoO<sub>2</sub>, and N-NiCoO<sub>2</sub>.

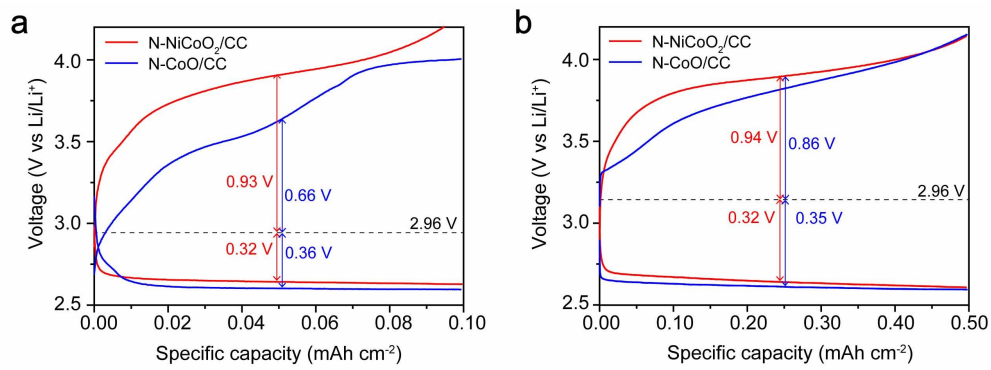

**Fig. S18** The initial discharge-charge curves of N-NiCoO<sub>2</sub>/CC and N-CoO/CC within a current density of 0.05 mA cm<sup>-2</sup> at a capacity limitation of 0.1 and 0.5 mAh cm<sup>-2</sup>.

**Table S1.** ICP of NNCO and NCO.

|             | <b>Ni</b><br><b>(<math>\mu\text{g/ml}</math>)</b> | <b>Co</b><br><b>(<math>\mu\text{g/ml}</math>)</b> | <b>Ni:Co</b> |
|-------------|---------------------------------------------------|---------------------------------------------------|--------------|
| <b>NNCO</b> | 5.653                                             | 11.027                                            | 0.513        |
| <b>NCO</b>  | 5.604                                             | 11.341                                            | 0.494        |

**Table S2.** The adsorption energies ( $\Delta E_{\text{ads}}$  [eV]) of  $\text{LiO}_2$  and the related factors on the CoO, N-CoO,  $\text{NiCoO}_2$ , and N- $\text{NiCoO}_2$ .

| Catalysts           | Crystal faces | $d_{\text{Li-O}}$ [Å] | $d_{\text{O-O}}$ [Å] | $\angle_{\text{O-Li-O}}$ [°] | $\Delta E_{\text{ads}}$ [eV] |
|---------------------|---------------|-----------------------|----------------------|------------------------------|------------------------------|
| CoO                 | (100)         | 1.833/1.915           | 1.442                | 45.182                       | -1.356                       |
| N-CoO               | (100)         | 1.861/1.871           | 1.45                 | 45.732                       | -1.313                       |
| $\text{NiCoO}_2$    | (100)         | 2.103/1.810           | 1.358                | 39.739                       | -0.080                       |
| N- $\text{NiCoO}_2$ | (100)         | 1.854/1.859           | 1.39                 | 43.964                       | -2.605                       |

**Table S3.** Comparison of electrochemical performance between this work and some reported oxide-based cathodes for LOBs.

| Catalysts                                  | Morphology        | Overpotential<br>(V) | Cycle number                                                                                                            | Reference            |
|--------------------------------------------|-------------------|----------------------|-------------------------------------------------------------------------------------------------------------------------|----------------------|
|                                            |                   |                      | [cycles/current density<br>(mA·cm <sup>-2</sup> )/cutoff<br>capacity (mAh cm <sup>-2</sup> or<br>mAh g <sup>-1</sup> )] |                      |
| Co <sub>3</sub> O <sub>4</sub> -<br>CNF@CC | nanoarrays        | 0.8                  | 87/0.05/0.15                                                                                                            | 1                    |
| NiCo <sub>2</sub> O <sub>4</sub> /CC       | nanowires         | 0.94                 | 200/0.2/0.3                                                                                                             | 2                    |
| CoNiO <sub>2</sub> /SCC-N                  | nanoneedle        | ~0.5                 | 147/0.05/0.25                                                                                                           | 3                    |
| Mn <sub>0.8</sub> Co <sub>0.2</sub> O      | nanorod           | 0.48                 | 30/0.05/0.5                                                                                                             | 4                    |
| Fe <sub>2</sub> O <sub>3</sub> /CNT        | nanoparticle      | 1.3                  | 50/0.1/1.0                                                                                                              | 5                    |
| MoNO                                       | nanosheets        | ~0.5                 | 50/0.1/1000                                                                                                             | 6                    |
| <b>NNCO/CC</b>                             | <b>nanoarrays</b> | <b>0.35</b>          | <b>550/0.05/0.1</b>                                                                                                     | <b>This<br/>work</b> |

## Reference

1. L. Xiao, D. Wang, M. Li, B. Deng and J. Liu, *J. Energy Chem.*, 2020, **46**, 248-255.
2. K. Song, B. Yang, Z. Li, Y. Lv, Y. Yu, L. Yuan, X. Shen and X. Hu, *Appl. Surface. Sci.*, 2020, **529**, 147064.
3. H. Liang, F. Chen, M. Zhang, S. Jing, B. Shen, S. Yin and P. Tsiakaras, *Appl. Catal. A: General*, 2019, **574**, 114-121.
4. D. Cao, L. Zheng, Q. Li, J. Zhang, Y. Dong, J. Yue, X. Wang, Y. Bai, G. Tan and C. Wu, *Nano Lett.*, 2021, **21**, 5225-5232.
5. Z. Li, S. Ganapathy, Y. Xu, Q. Zhu, W. Chen, I. Kochetkov, C. George, L. F. Nazar and M. Wagemaker, *Adv. Energy Mater.*, 2018, **8**, 1703513.
6. S. Zhang, G. Wang, J. Jin, L. Zhang and Z. Wen, *Energy Storage Mater.*, 2020, **28**, 342-349.
